# Supplementary material for: Characterization of the H2 sensing mechanism of Pd-promoted SnO2 by XAS in operando conditions
Source: Royal Society of Chemistry journal article supplement (doi:10.1039/b509826b), 2005-01-01
Supplement: b509826b.pdf [file b509826b.pdf]

Fig. 1 shows the photos of the *in situ* cell. The volume of the cell The 25  $\mu\text{m}$  kapton window allowed us to measure XAS spectra in fluorescence mode at Pd K- and Sn L edges. The electrical conductance was measured at a fixed voltage ( $U = 1 \text{ V}$ ) between two contacts deposited on the sample surface by vacuum evaporation. It was possible to heat the sample up to  $400 \text{ }^\circ\text{C}$ . A system of 6 Bronkhorst mass flow controllers and Valco two-position switching valve was used to prepare different gas mixtures containing  $\text{H}_2$ ,  $\text{O}_2$  and He. The studies were carried out under an atmospheric pressure at  $100 \text{ ml/min}$  gas flow rate. The mass-spectrometer (Pfeiffer) was connected to the outlet of the cell.

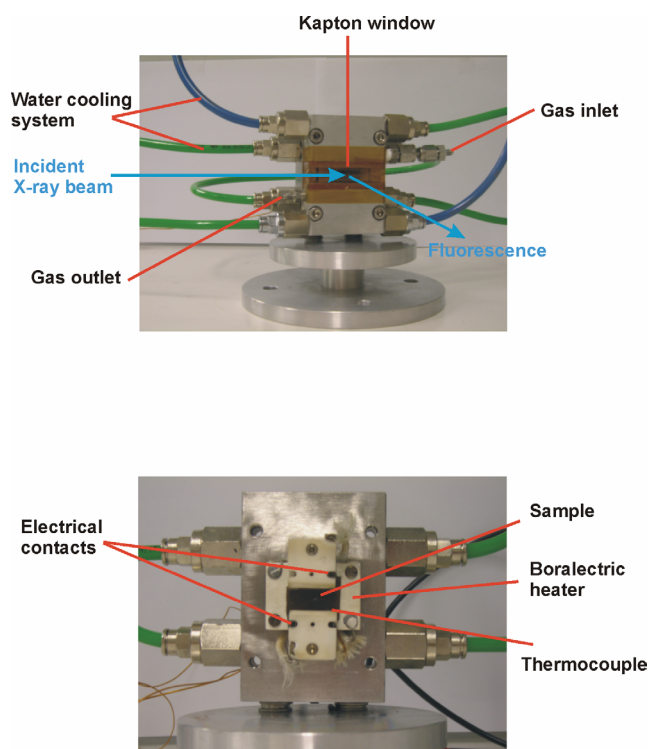

**Fig.1** The picture of the *in situ* cell from outside and inside.

Fig. 2 shows the examples of the fitted EXAFS spectra measured at Pd K- and Sn L1- edges for Pd-promoted SnO<sub>2</sub> film in the steady-state conditions (A-H states). Structural and statistical parameters are given in the Table 1.

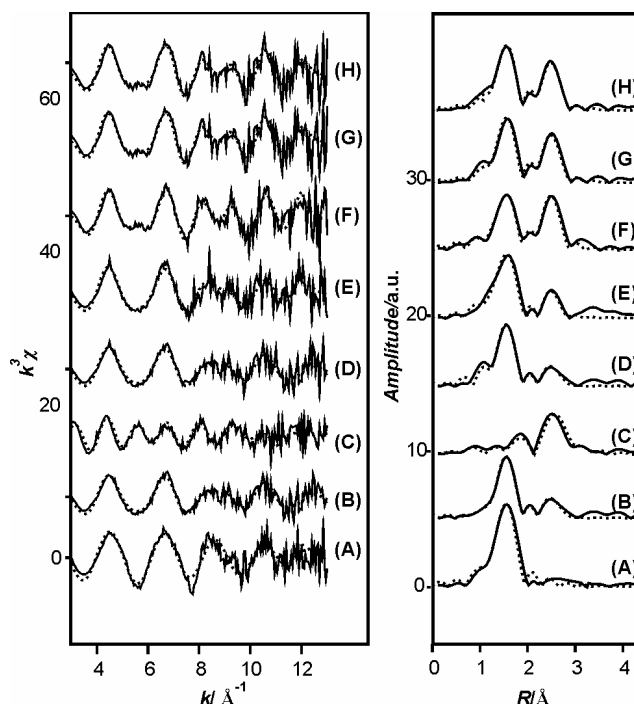

Fig.2 The Pd K EXAFS spectra of Pd- SnO<sub>2</sub> in steady state conditions. Solid lines and dotted line indicate experimental data the best fit.

**Table 1** Structural and statistical parameters derived from analysis of XANES and EXAFS spectra.

| State | T, K | Gas phase                 | Scatter | $R / \text{\AA}$ | CN     | $\sigma^2 / \text{\AA}^2$ | Sn <sup>2+</sup> /% | Pd <sup>2+</sup> /% |
|-------|------|---------------------------|---------|------------------|--------|---------------------------|---------------------|---------------------|
| A     | 573  | 20%O <sub>2</sub>         | O       | 2.015(9)         | 3.9(6) | 0.004(1)                  | <1.5                | 100                 |
|       |      |                           | Pd      | -                | -      | -                         |                     |                     |
| B     | 573  | 20%O <sub>2</sub>         | O       | 2.02 (1)         | 2.8(6) | 0.004(2)                  | <1.5                | 75                  |
|       |      |                           | Pd      | 2.73(2)          | 1(1)   | 0.011(7)                  |                     |                     |
| C     | 573  | 1000ppm<br>H <sub>2</sub> | O       | -                | -      | -                         | 9                   | 0                   |
|       |      |                           | Pd      | 2.74(1)          | 8(2)   | 0.019(2)                  |                     |                     |
| D     | 573  | 20%O <sub>2</sub>         | O       | 2.02 (1)         | 2.7(6) | 0.005(2)                  | <1.5                | 74                  |
|       |      |                           | Pd      | 2.74(2)          | 1(1)   | 0.012(7)                  |                     |                     |
| E     | 373  | 20%O <sub>2</sub>         | O       | 2.04(1)          | 3.1(8) | 0.005(3)                  | <1.5                | 74                  |
|       |      |                           | Pd      | 2.73(2)          | 1(1)   | 0.010(7)                  |                     |                     |
| F     | 373  | 20%O <sub>2</sub>         | O       | 2.03(1)          | 2.3(7) | 0.004(3)                  | <1.5                | 64                  |
|       |      |                           | Pd      | 2.73(1)          | 3(1)   | 0.0010(3)                 |                     |                     |
| G     | 373  | 1000ppm<br>H <sub>2</sub> | O       | 2.03(1)          | 2.5(7) | 0.004(2)                  | <1.5                | 62                  |
|       |      |                           | Pd      | 2.73(1)          | 2(1)   | 0.009(3)                  |                     |                     |
| H     | 373  | 20%O <sub>2</sub>         | O       | 2.03(1)          | 2.6(7) | 0.005(2)                  | <1.5                | 61                  |
|       |      |                           | Pd      | 2.74(1)          | 2(1)   | 0.009(3)                  |                     |                     |

EXAFS analysis is performed for Pd ( $R$  = bond length,  $CN$  = coordination number and  $\sigma^2$  = Debye Waller factor). Sn<sup>2+</sup> and Pd<sup>2+</sup> concentrations are calculated from XANES data.
